# Supplementary material for: Evolutionary Patterns in Coiled-Coils
Source: PubMed Central journal article supplement (PMC4350178; doi:10.1093/gbe/evv007), 2015-01-10
Supplement: supp_evv007_evv007-supplementary_materials.pdf [file supp_evv007_evv007-supplementary_materials.pdf]

# Supplementary material

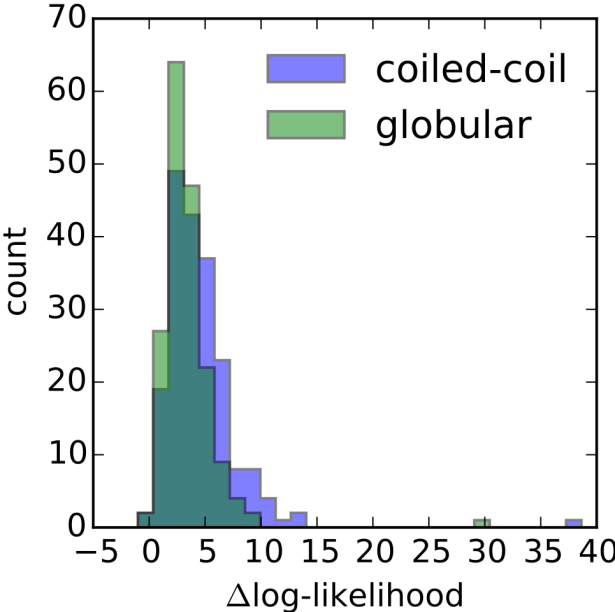

**Fig. S1.** Per site log-likelihood difference between a random and the best (maximum likelihood) guess of the evolutionary relationship between sequences.

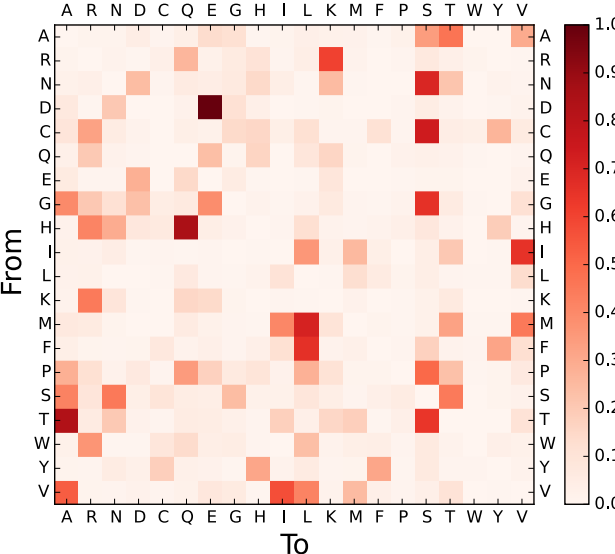

**Fig. S2.** Amino acid substitution rates ( $q_{ij}$ ) in the CC model.

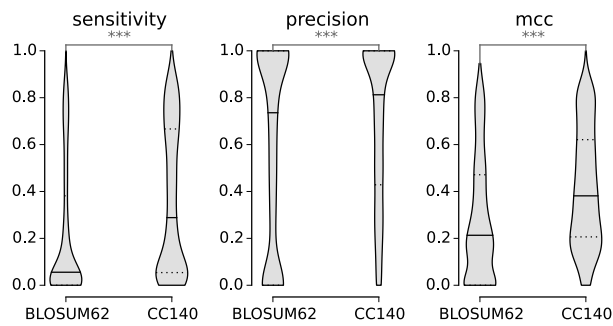

**Fig. S3.** Homology search improvement under the CC model in plants (Ensembl Plants). Homology search comparison between CC140 and BLOSUM62 scoring matrix at the e-value threshold of  $1e-08$ . Statistical significance between samples was estimated with the Mann-Whitney U test (\*\*\*) p-value < 0.001).
